# Supplementary material for: Patterns of hysterectomy in India: a national and state‐level analysis of the Fourth National Family Health Survey (2015–2016)
Source: PubMed Central journal article supplement — BJOG. 2019 Sep 2;126(Suppl Suppl 4):72–80. doi: 10.1111/1471-0528.15858 (PMC6772015; doi:10.1111/1471-0528.15858), 2019-09-02
Supplement: BJO-126-72-s001.pdf [file BJO-126-72-s001.pdf]

**Table S1.** Age-specific prevalence of hysterectomy and place of hysterectomy performed in Indian states, 2015-16

| State                 | Age-specific prevalence |             |             | Place of hysterectomy (15-49 years) |                              |
|-----------------------|-------------------------|-------------|-------------|-------------------------------------|------------------------------|
|                       | 15-29 years             | 30-39 years | 40-49 years | Public facilities                   | Private and other facilities |
| Andaman and Nicobar   | 0.6                     | 2.3         | 3.8         | 24.1                                | 75.9                         |
| Andhra Pradesh        | 1.1                     | 9.6         | 22.4        | 16.7                                | 83.3                         |
| Arunachal Pradesh     | 0.3                     | 2.7         | 4.5         | 70.4                                | 29.6                         |
| Assam                 | 0.1                     | 0.9         | 3.0         | 66.0                                | 34.0                         |
| Bihar                 | 1.0                     | 8.2         | 14.5        | 17.9                                | 82.1                         |
| Chandigarh            | 0.0                     | 0.6         | 5.7         | 54.3                                | 45.7                         |
| Chhattisgarh          | 0.1                     | 1.8         | 6.3         | 35.0                                | 65.1                         |
| Dadra and Nagar Havel | 0.7                     | 3.1         | 13.1        | 61.0                                | 39.0                         |
| Daman and Diu         | 0.6                     | 2.1         | 10.8        | 25.6                                | 74.4                         |
| Delhi                 | 0.1                     | 1.2         | 3.7         | 35.8                                | 64.2                         |
| Goa                   | 0.5                     | 0.6         | 7.9         | 44.3                                | 55.7                         |
| Gujarat               | 0.2                     | 4.2         | 12.6        | 30.6                                | 69.4                         |
| Haryana               | 0.2                     | 1.9         | 6.2         | 41.3                                | 58.7                         |
| Himachal Pradesh      | 0.0                     | 1.2         | 7.1         | 46.0                                | 54.0                         |
| Jammu And Kashmir     | 0.1                     | 2.7         | 8.9         | 62.5                                | 37.5                         |
| Jharkhand             | 0.4                     | 3.5         | 6.2         | 27.1                                | 73.0                         |
| Karnataka             | 0.5                     | 3.3         | 8.1         | 52.8                                | 47.2                         |
| Kerala                | 0.0                     | 0.6         | 5.8         | 41.6                                | 58.4                         |
| Lakshadweep           | 0.0                     | 0.3         | 3.2         | 20.7                                | 79.3                         |
| Madhya Pradesh        | 0.4                     | 3.7         | 8.6         | 44.3                                | 55.7                         |
| Maharashtra           | 0.2                     | 2.6         | 7.9         | 30.8                                | 69.2                         |
| Manipur               | 0.1                     | 1.4         | 4.9         | 52.3                                | 47.8                         |
| Meghalaya             | 0.1                     | 1.0         | 4.3         | 71.4                                | 28.6                         |
| Mizoram               | 0.0                     | 1.0         | 3.5         | 62.9                                | 37.1                         |
| Nagaland              | 0.2                     | 1.5         | 4.8         | 49.0                                | 51.0                         |
| Odisha                | 0.2                     | 1.9         | 6.5         | 71.4                                | 28.6                         |
| Puducherry            | 0.1                     | 0.8         | 5.5         | 68.2                                | 31.8                         |
| Punjab                | 0.1                     | 2.0         | 8.6         | 35.2                                | 64.8                         |
| Rajasthan             | 0.2                     | 2.8         | 7.3         | 33.8                                | 66.2                         |
| Sikkim                | 0.0                     | 1.5         | 4.6         | 55.0                                | 45.0                         |
| Tamil Nadu            | 0.6                     | 3.2         | 8.6         | 52.6                                | 47.4                         |
| Telangana             | 1.1                     | 9.5         | 20.1        | 18.8                                | 81.2                         |
| Tripura               | 0.2                     | 1.2         | 3.9         | 41.5                                | 58.6                         |
| Uttar Pradesh         | 0.2                     | 3.2         | 7.3         | 23.0                                | 77.0                         |
| Uttarakhand           | 0.1                     | 2.2         | 7.1         | 38.8                                | 61.2                         |
| West Bengal           | 0.1                     | 1.5         | 6.9         | 49.2                                | 50.8                         |
| India                 | 0.4                     | 3.6         | 9.2         | 32.4                                | 67.7                         |

**Table S2.** Prevalence of hysterectomy and unadjusted odds ratios (95% CI) by background characteristics, India, 2015-16

|                           | India |         |             | Gujarat |         |                | Bihar |         |               | Andhra Pradesh |         |               | Telangana |         |               |
|---------------------------|-------|---------|-------------|---------|---------|----------------|-------|---------|---------------|----------------|---------|---------------|-----------|---------|---------------|
|                           | %     | uOR     | CI          | %       | uOR     | CI             | %     | uOR     | CI            | %              | uOR     | CI            | %         | uOR     | CI            |
| <b>Age of women</b>       |       |         |             |         |         |                |       |         |               |                |         |               |           |         |               |
| 15-29 years               | 0.4   | 1.00    |             | 0.2     | 1.00    |                | 1.0   | 1.00    |               | 1.10           | 1.00    |               | 1.1       | 1.00    |               |
| 30-39 years               | 3.6   | 10.33** | (9.5,11.3)  | 4.2     | 21.88** | (13.58,35.25)  | 8.2   | 8.87**  | (7.53,10.47)  | 9.6            | 9.42**  | (6.79,13.06)  | 9.5       | 9.73**  | (7.02,13.48)  |
| 40-49 years               | 9.2   | 28.07** | (25.8,30.6) | 12.6    | 72.83** | (45.76,115.92) | 14.5  | 16.86** | (14.34,19.82) | 22.4           | 25.63** | (18.68,35.17) | 20        | 23.37** | (16.98,32.16) |
| <b>No. of children</b>    |       |         |             |         |         |                |       |         |               |                |         |               |           |         |               |
| 0-1                       | 0.7   | 1.00    |             | 0.7     | 1.00    |                | 0.5   | 1.00    |               | 2.0            | 1.00    |               | 1.5       | 1.00    |               |
| 2                         | 4.2   | 6.70**  | (6.2,7.3)   | 5.8     | 8.44**  | (6.16,11.57)   | 4.7   | 10.70** | (8.01,14.29)  | 10.7           | 5.79**  | (4.43,7.56)   | 9.1       | 6.38**  | (4.51,9.03)   |
| 3+                        | 6.0   | 9.82**  | (9.1,10.6)  | 8.2     | 12.35** | (9.14,16.68)   | 9.8   | 23.76** | (18.23,30.96) | 15.9           | 9.11**  | (6.95,11.93)  | 14.8      | 11.10** | (7.93,15.55)  |
| <b>Education</b>          |       |         |             |         |         |                |       |         |               |                |         |               |           |         |               |
| Uneducated                | 5.7   | 1.00    |             | 7.7     | 1.00    |                | 7.4   | 1.00    |               | 14.7           | 1.00    |               | 15.6      | 1.00    |               |
| 1-5 years                 | 4.3   | 0.73**  | (0.7,0.8)   | 5.7     | 0.73**  | (0.57,0.93)    | 5.8   | 0.78**  | (0.67,0.91)   | 12.3           | 0.81*   | (0.67,0.99)   | 13.9      | 0.87    | (0.65,1.16)   |
| 5-10 years                | 2.3   | 0.38**  | (0.4,0.4)   | 3.1     | 0.39**  | (0.32,0.47)    | 3.5   | 0.45**  | (0.40,0.51)   | 6.2            | 0.38**  | (0.32,0.46)   | 3.5       | 0.20**  | (0.15,0.26)   |
| 10+years                  | 1.0   | 0.17**  | (0.2,0.2)   | 1.9     | 0.24**  | (0.18,0.32)    | 1.9   | 0.24**  | (0.19,0.30)   | 1.3            | 0.08**  | (0.05,0.12)   | 1.3       | 0.07**  | (0.04,0.11)   |
| <b>Place of residence</b> |       |         |             |         |         |                |       |         |               |                |         |               |           |         |               |
| Rural                     | 3.4   | 1.00    |             | 4.4     | 1.00    |                | 5.4   | 1.00    |               | 9.70           | 1.00    |               | 10.3      | 1.00    |               |
| Urban                     | 2.7   | 1.25**  | (1.2,1.3)   | 4       | 1.11    | (0.93,1.32)    | 5.2   | 1.04    | (0.89,1.24)   | 7.3            | 1.37**  | (1.14,1.63)   | 5         | 2.16**  | (1.69,2.78)   |
| <b>Caste</b>              |       |         |             |         |         |                |       |         |               |                |         |               |           |         |               |
| SC/ST                     | 2.7   | 1.00    |             | 3.8     | 1.00    |                | 4.8   | 1.00    |               | 7.80           | 1.00    |               | 9.1       | 1.00    |               |
| Others                    | 3.4   | 1.26**  | (1.2,1.3)   | 4.3     | 1.13    | (0.92,1.34)    | 5.5   | 1.16*   | (1.03,1.31)   | 9.3            | 1.22*   | (1.02,1.46)   | 7.2       | 0.78**  | (0.63,0.96)   |
| <b>Religion</b>           |       |         |             |         |         |                |       |         |               |                |         |               |           |         |               |
| Hindu                     | 3.4   | 1.00    |             | 4.2     | 1.00    |                | 5.6   | 1.00    |               | 9.20           | 1.00    |               | 8.2       | 1.00    |               |
| Non-Hindu                 | 2.3   | 0.69**  | (0.6,0.7)   | 4       | 0.95    | (0.71,1.30)    | 4.2   | 0.74**  | (0.64,0.86)   | 7.5            | 0.8     | (0.63,1.01)   | 4.6       | 0.54**  | (0.39,0.75)   |
| <b>Household wealth</b>   |       |         |             |         |         |                |       |         |               |                |         |               |           |         |               |
| Poor                      | 2.8   | 1.00    |             | 3.8     | 1.00    |                | 5.2   | 1.00    |               | 7.60           | 1.00    |               | 8.7       | 1.00    |               |
| Medium                    | 3.6   | 1.31**  | (1.2,1.4)   | 3.9     | 1.02    | (0.81,1.28)    | 6     | 1.18*   | (1.04,1.34)   | 9.7            | 1.31*   | (1.05,1.64)   | 8.4       | 0.96    | (0.77,1.19)   |
| Rich                      | 3.3   | 1.19**  | (1.1,1.2)   | 4.5     | 1.19    | (0.98,1.45)    | 5.7   | 1.12    | (0.97,1.28)   | 8.9            | 1.19    | (0.96,1.47)   | 6.9       | 0.78*   | (0.62,0.97)   |
| <b>Sterilized</b>         |       |         |             |         |         |                |       |         |               |                |         |               |           |         |               |
| No                        | 2.4   | 1.00    |             | 3       | 1.00    |                | 5     | 1.00    |               | 3.00           | 1.00    |               | 5.6       | 1.00    |               |
| Yes                       | 5.2   | 2.29**  | (2.2,2.4)   | 7.4     | 2.56**  | (2.16,3.03)    | 7.1   | 1.44**  | (1.29,1.61)   | 13.3           | 4.93**  | (4.03,6.04)   | 10.3      | 1.93**  | (1.61,2.32)   |

\*indicates significant at  $p$  value<.05 and \*\* indicate significant at  $p$  value<.01
